# Supplementary material for: Simultaneous determination of epinephrine and uric acid at ordered mesoporous carbon modified glassy carbon electrode
Source: Royal Society of Chemistry journal article supplement (doi:10.1039/c2ay25168j), 2012-01-01
Supplement: c2ay25168j.pdf [file c2ay25168j.pdf]

## Electronic supplementary information

# Simultaneous determination of epinephrine and uric acid at ordered mesoporous carbon modified glassy carbon electrode

Liqiang Luo<sup>a\*</sup>, Fang Li<sup>a</sup>, Limei Zhu<sup>a</sup>, Zhao Zhang<sup>a</sup>, Yaping Ding<sup>a</sup>, Dongmei Deng<sup>a</sup> and Bo Lu<sup>b</sup>

### Raman spectrum of OMC

The existence of edge-plane-like defective sites of OMC can be demonstrated by Raman spectrum, as shown in Fig. S1. Two bands, located at 1340 and 1595  $\text{cm}^{-1}$ , exhibiting the presence of D band and G band. The D band at around 1340  $\text{cm}^{-1}$  is associated with the presence of defects in the graphite layer, arising from  $sp^3$ -hybridized carbon. The peak at 1595  $\text{cm}^{-1}$  is Raman-active  $E_{2g}$ , which is due to the vibration mode corresponding to the movement in opposite directions of two neighboring carbon atoms in a single crystal graphite sheet. According to the references 30 and 31, the relative intensity ratio of the D and G bands ( $I_D/I_G$  ratio) is proportional to the number of defect sites. The  $I_D/I_G$  ratio is calculated as 0.78, indicating that there are significant edge-plane-like defective sites existing on the surface of OMC. The result was in keeping with references 33 and 40.

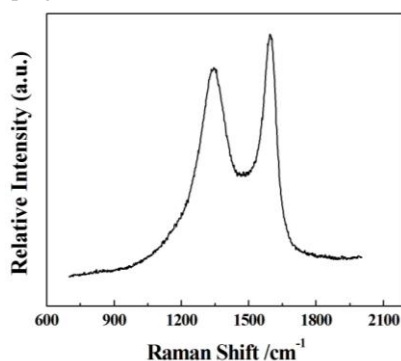

Fig. S1. Raman spectrum of OMC.

### FTIR of OMC

The presence of the oxygen-containing groups on the surface of OMC can be confirmed by Fourier transform infrared spectroscopy (FTIR), as shown in Fig. S2. The band around 1680  $\text{cm}^{-1}$  is assigned to C=O stretch vibration, the bands around 1550  $\text{cm}^{-1}$  and 1480  $\text{cm}^{-1}$  are attributed to COO<sup>-</sup> stretch asymmetric vibration. The band around 1200  $\text{cm}^{-1}$  is ascribed to O-H vibration, while the zone around 3448  $\text{cm}^{-1}$  is responsible for carboxylic acid O-H stretch vibration. The result was consistent with that of references 35, 36 and 40.

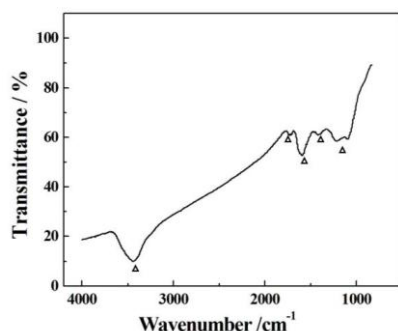

Fig. S2. FTIR of OMC

<sup>a</sup>College of Sciences, Shanghai University, Shanghai 200444, PR China. E-mail: luoliqw@yahoo.com.cn.

Fax: +86-21-66132797; Tel: +86-21-66134734

<sup>b</sup>Laboratory for Microstructures, Shanghai University, Shanghai 200444, PR China.
